# Supplementary material
Source: PubMed Central journal article supplement (PMC6797499)
Supplement: EMS84561-supplement-Supplementary_File_4.pdf [file EMS84561-supplement-Supplementary_File_4.pdf]

## Antibodies

| ANTIBODY                 | COMPANY       | CATALOGUE No | CLONAL (CLONE)             | DILUTION (TECHNIQUE) |
|--------------------------|---------------|--------------|----------------------------|----------------------|
| Acetylated-tubulin       | Sigma-Aldrich | T7451        | Mouse monoclonal (6-11B-1) | 1:1000 (IF)          |
| CC10 (SCGB1A1)           | Santa Cruz    | sc-25555     | Rabbit polyclonal (FL-96)  | 1:200 (IF)           |
| CD11b-APC                | Biolegend     | 10121        | Rat monoclonal (M1/70)     | 1:100 (FC)           |
| CD11b-APCCy7             | Biolegend     | 101226       | Rat monoclonal (M1/70)     | 1:100 (FC)           |
| CD45-BV421               | Biolegend     | 103133       | Rat monoclonal (30-F11)    | 1:200 (FC)           |
| CD45-APC                 | eBioscience   | 17-0451-83   | Rat monoclonal (30-F11)    | 1:200 (FC)           |
| CD45-APC-eFluor780       | eBioscience   | 47-0451-82   | Rat monoclonal (30-F11)    | 1:200 (FC)           |
| CD49f-PerCP-eFluor710    | eBioscience   | 46-0495-82   | Rat monoclonal (ebioGOH3)  | 1:200 (FC)           |
| CD104-eFluor660          | eBioscience   | 50-1049-82   | Rat monoclonal (439-9b)    | 1:100 (FC; IF)       |
| CD326(EPCAM)-APC         | eBioscience   | 17-5791-81   | Rat monoclonal (G8.8)      | 1:200 (FC)           |
| CD326(EPCAM)-APC750Fire  | Biolegend     | 118230       | Rat monoclonal (G8.8)      | 1:200 (FC)           |
| E-CADHERIN               | Abcam         | Ab11512      | Rat monoclonal (DECMA-1)   | 1:200 (IF)           |
| GFP                      | Abcam         | ab6673       | Goat polyclonal            | 1:300 (IF)           |
| HOPX                     | Santa Cruz    | sc-30216     | Rabbit polyclonal (FL-73)  | 1:250 (IF)           |
| Ki67                     | Abcam         | Ab16667      | Rabbit monoclonal (SP6)    | 1:300 (IF)           |
| Ly6A/E(SCA-1)-APC        | Biolegend     | 108111       | Rat monoclonal (D7)        | 1:200 (FC)           |
| Ly6A/E(SCA-1)-APC750Fire | Biolegend     | 127652       | Rat monoclonal (D7)        | 1:200 (FC)           |
| Ly6A/E(SCA-1)-BV786      | BD Bioscience | 563991       | Rat monoclonal (D7)        | 1:200 (FC)           |
| Ly6G-APC                 | BD Bioscience | 560599       | Rat monoclonal (1A8)       | 1:150 (FC)           |
| Ly6G-APC750Fire          | Biolegend     | 127652       | Rat monoclonal (1A8)       | 1:150 (FC)           |
| Ly6G-V450                | BD Bioscience | 560603       | Rat monoclonal (1A8)       | 1:150 (FC)           |
| mCHERRY                  | Abcam         | ab183628     | Rabbit polyclonal          | 1:750 (IF)           |
| SOX2                     | eBioscience   | 14-9811-80   | Rat monoclonal (Btjce)     | 1:500 (IF)           |
| SP-C                     | Santa Cruz    | sc-7706      | Goat polyclonal (M-20)     | 1:200 (IF)           |
| TER-119                  | Biolegend     | 116233       | Rat monoclonal (TER-119)   | 1:200 (FC)           |
| TTF1                     | DAKO          | M3575        | Mouse monoclonal (8G7G3/1) | 1:50 (IF)            |
| WISP1                    | Abcam         | Ab178547     | Rabbit polyclonal          | 1:100 (IF)           |

**Primers (qRT-PCR)**

| <b>GENE SYMBOL</b>   | <b>FORWARD</b>         | <b>REVERSE</b>           |
|----------------------|------------------------|--------------------------|
| <i>Gapdh</i>         | CGTGTTCTACCCCAATGT     | TGTCATCATACTTGGCAGGTTTCT |
| <i>Sftpb</i>         | TGTGCCAAGAGTGTGAGGAT   | CAGGGGCAGGTAGACATCAA     |
| <i>Sftpc</i>         | GGTCCTGATGGAGAGTCCAC   | GATGAGAAGGCCTTTGAGGT     |
| <i>Abca3</i>         | CTGCTTGAAACAACCTGGTG   | GGAGCAGGAACGCTGAGAT      |
| <i>Pdpr</i>          | CAGTGTTGTTCTGGGTTTTGG  | ACCTGGGGTCACAATATCATCT   |
| <i>Ager (Rage)</i>   | GTGGTCAGAACATCACAGCC   | ATTGGGGAGGATTCGAGCC      |
| <i>Aqp5</i>          | TAACCTGGCCGTCAATGC     | GCCAGCTGGAAAGTCAAGAT     |
| <i>Krt6</i>          | AACCTGCAAATTGACCCAC    | GGTGTCCAGGACCTTGTCT      |
| <i>Vim</i>           | CCAACCTTTTCTTCCCTGAA   | TTGAGTGGGTGTCAACCAGA     |
| <i>Snail (Snai1)</i> | CTCTGAAGATGCACATCCGAA  | GGCTTCTCACCAGTGTGGGT     |
| <i>Twist</i>         | GCCGGAGACCTAGATGTCATTG | CACGCCCTGATTCTTGTGAA     |
| <i>N-cadherin</i>    | CTGCCATGACTTTCTACGGAGA | CAATGACGTCCACCCTGTTCT    |
| <i>E-cadherin</i>    | CGACCCTGCCTCTGAATCC    | TACACGCTGGGAAACATGAGC    |
