# Supplementary material
Source: PubMed Central journal article supplement (PMC6797499)
Supplement: EMS84561-supplement-Supplementary_File_5.pdf [file EMS84561-supplement-Supplementary_File_5.pdf]

Patients information about pulmonary breast cancer metastases:

| CaseID  | Date of primary tumour | Tumour type               | ER score | PR score | HER2 score (Hercept test) | Grade | Time to pulmonary relapse (months) |
|---------|------------------------|---------------------------|----------|----------|---------------------------|-------|------------------------------------|
| TR191_6 | 2010                   | Invasive ductal carcinoma | 0        | 0        | 3+                        | N/A   | 64                                 |
| TR191_7 | 2010                   | Invasive ductal carcinoma | 0        | 0        | 3+                        | N/A   | 64                                 |
| TR191_8 | Not available          | Invasive ductal carcinoma | 0        | 0        | 3+                        | N/A   | Unknown                            |
| TR191_9 | Not available          | Invasive ductal carcinoma | 0        | 0        | 3+                        | N/A   | Unknown                            |
