# Supplementary material
Source: PubMed Central journal article supplement (PMC6797499)

###

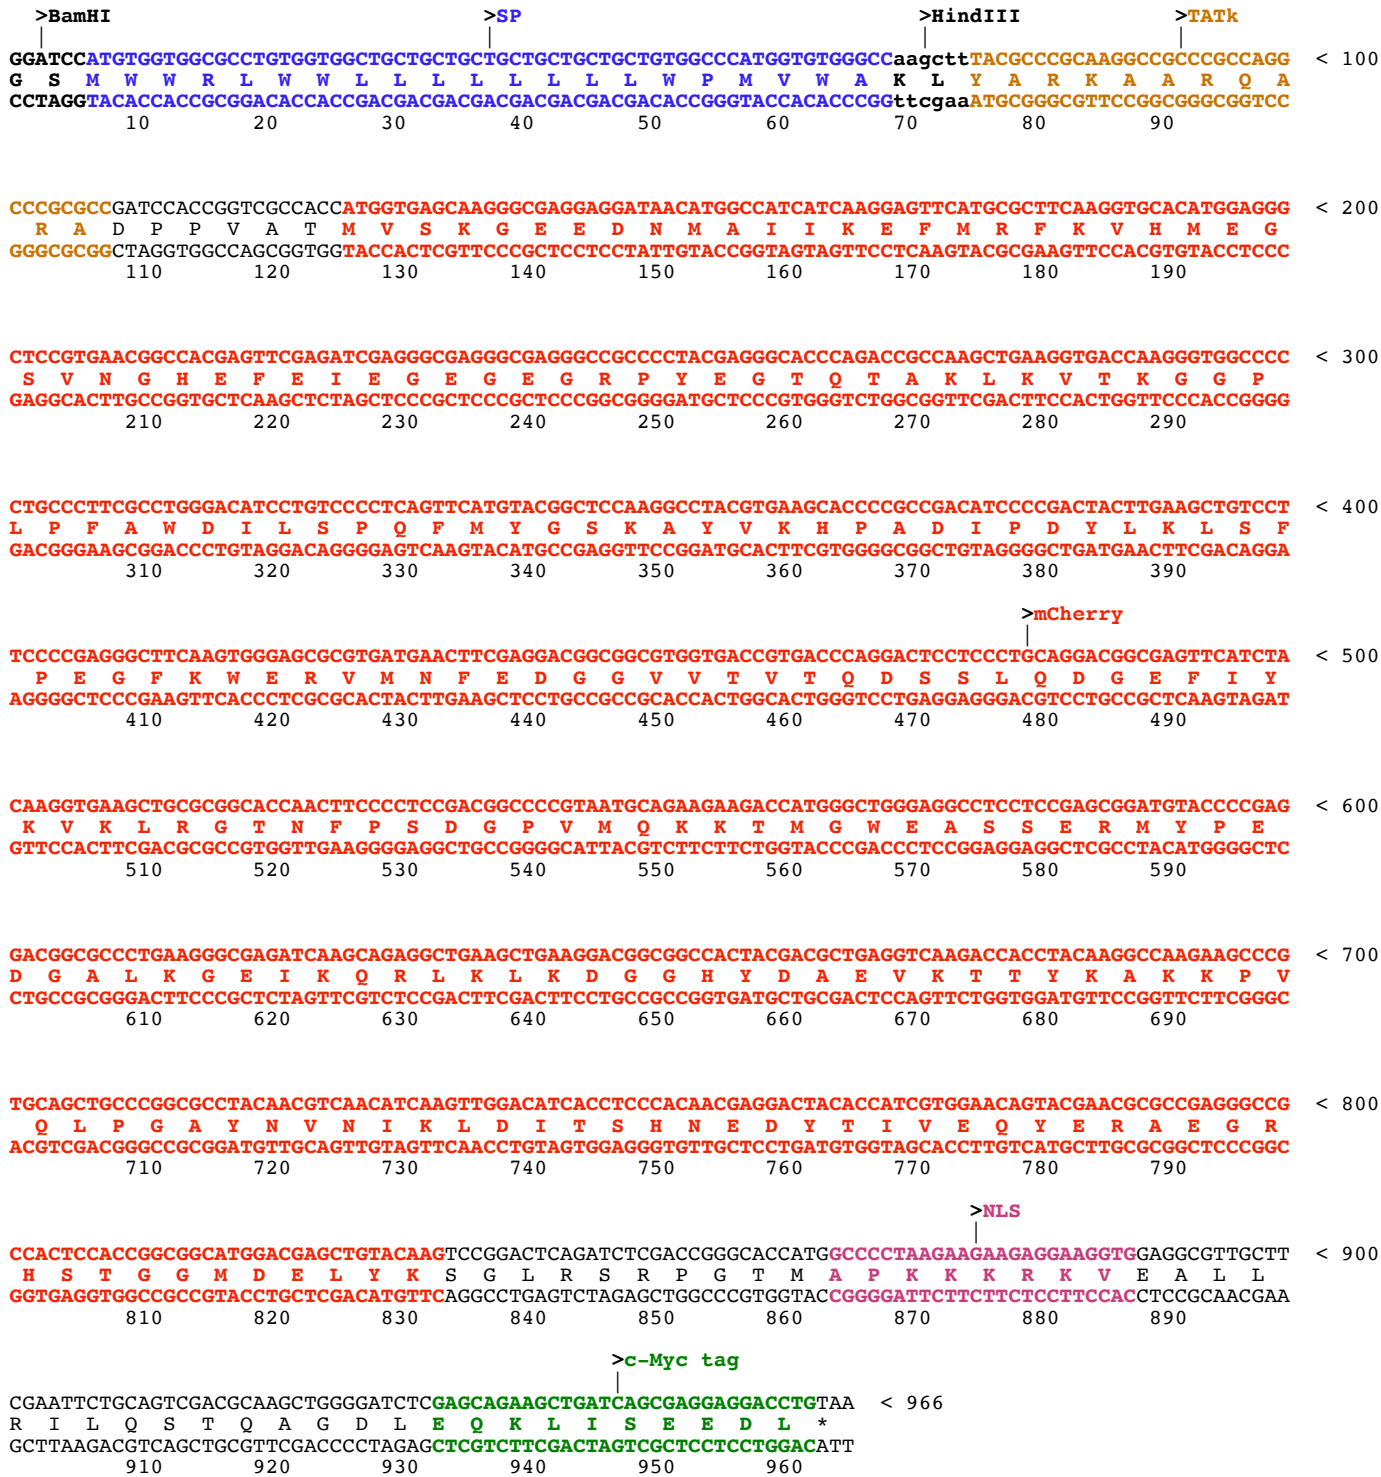

Features :

- BamHI : [1 : 6 - CW]
- SP : [7 : 69 - CW]
- HindIII : [70 : 75 - CW]
- TATk : [76 : 108 - CW]
- mCherry : [127 : 834 - CW]
- NLS : [865 : 888 - CW]
- c-Myc tag : [934 : 963 - CW]

Supplement: EMS84561-supplement-Supplementary_File_6.pdf [file EMS84561-supplement-Supplementary_File_6.pdf]
